# Supplementary figures and images for: A Proteomic Approach to Study the Biological Role of Hepatitis C Virus Protein Core+1/ARFP
Source: MDPI journal article supplement (doi:10.3390/v14081694), 2022-07-31

# Fold Change

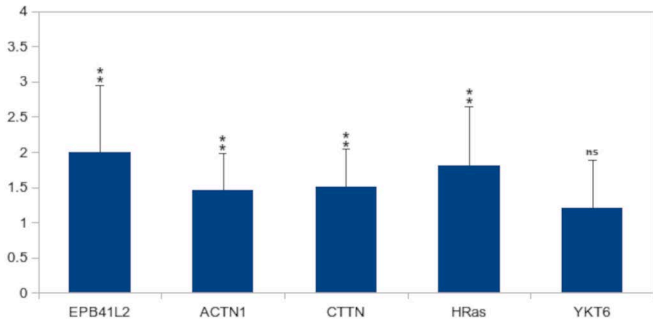

Supplement: s1 [file s1]

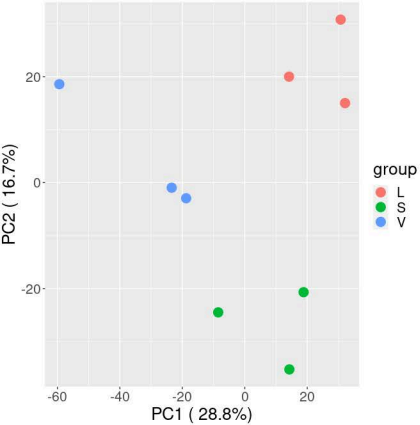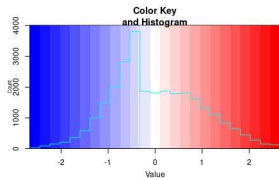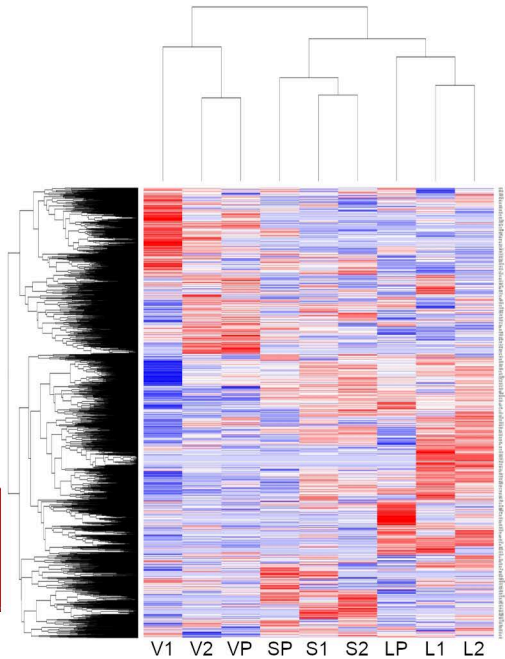

Supplement: s1 [file s1]
